# Supplementary material
Source: PubMed Central journal article supplement (PMC2630445)
Supplement: tpc.108.062919_1.pdf [file tpc.108.062919_1.pdf]

Supplemental Data. Wang et al. (2008) Truncation of a Protein Disulfide Isomerase, PDIL2-1, Delays Embryo Sac Maturation and Disrupts Pollen Tube Guidance in *Arabidopsis thaliana*

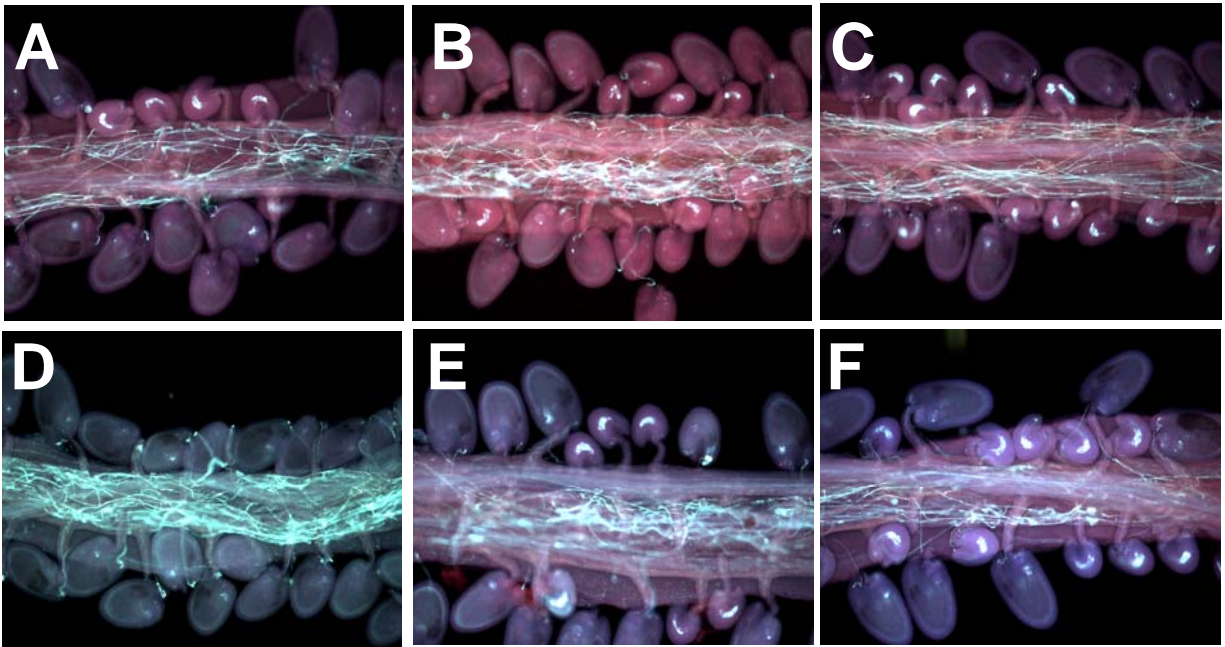

**Supplemental Figure 1. Pollen tube growth defects.**

(A). Silique of a Truncation 1 transgenic plant. (B). Silique of a Truncation 2 transgenic plant. (C). Silique of a PDIL2-1 CDS transgenic plant. (D). Silique of a PDIL2-1 CDSM transgenic plant. (E). Silique of a line5 heterozygous plant. (F). Silique of a line 5 homozygous plant.

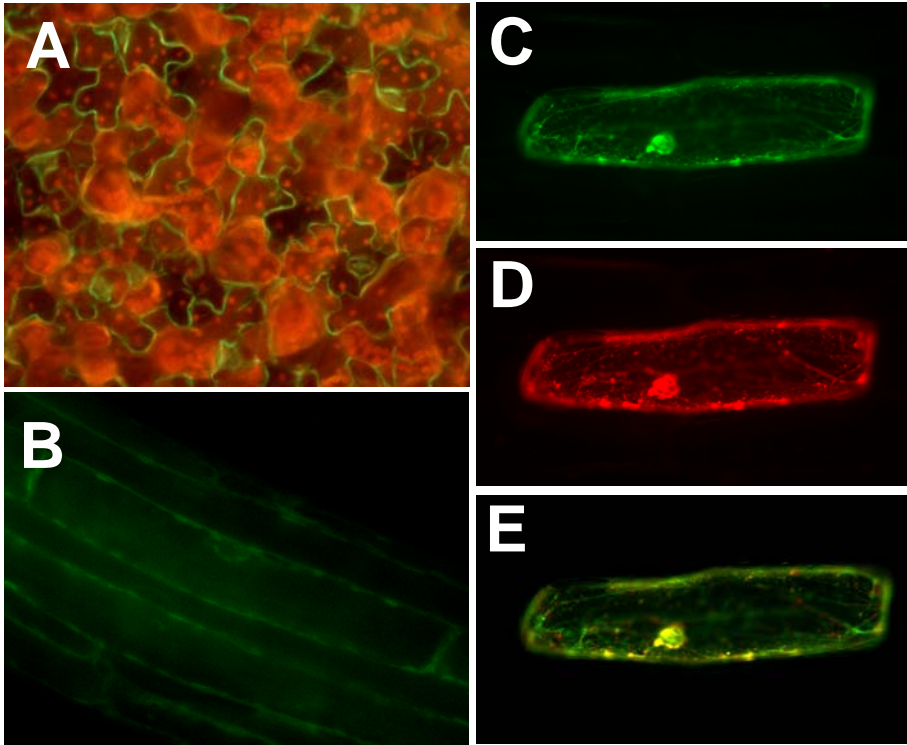

**Supplemental Figure 2. Subcellular Localization of PDIL2-1 and of the Truncated PDIL2-1 Missing D domain.**

*ProPDIL2-1:SP-YFP-PDIL2-1* expression in leaf epidermal cells (A) and in hypocotyl cells (B). D-domain truncated Silique of a Truncation 2 transgenic plant. (C). GFP-KDEL, an ER marker. (D) PDIL2-1 $\Delta$ D-tdTomato red fusion protein. (E) Overlay of (C) and (D).

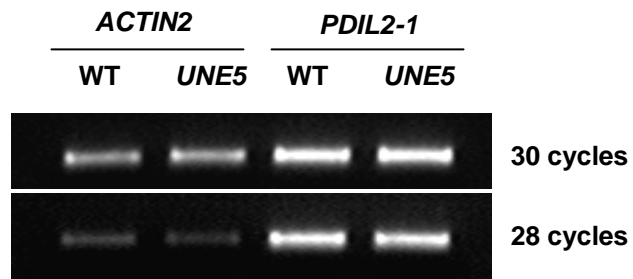

**Supplemental Figure 3. Expression of PDIL2-1 in wild type and UNE5.**

RT-PCR with inflorescences of wild type and the UNE5 transposon insertion line. *Actin2* was used as control.

**Supplemental Table 1.** Embryo sac developmental stages in Line 4, 5 and *PDIL2-1*

## Transgenic Plants

|              | Undeveloped ovules | Normal embryo sac | 1 or 2-nuclei embryo sacs | 4-nuclei embryo sacs | 8-nuclei embryo sacs (immature, no cellularization) |
|--------------|--------------------|-------------------|---------------------------|----------------------|-----------------------------------------------------|
| Line 5 HZ    | 50%                | 48%               | 21%                       | 13%                  | 17%                                                 |
| Line 5 HO    | 70%                | 22%               | 55%                       | 9%                   | 10%                                                 |
| Line 4 HZ    | 50%                | 48%               | 43%                       | -                    | -                                                   |
| Line 5 HO    | 59%                | 51%               | 20%                       | 28%                  | -                                                   |
| CDS          | 49%                | 54%               | 30%                       | 14%                  | -                                                   |
| Truncation 1 | 40%                | 46%               | 53%                       | -                    | -                                                   |
| Truncation 2 | 59%                | 77%               | 23%                       | -                    | -                                                   |

Unpollinated pistils and open flowers were used for the phenotypic analysis of embryo sac development. HZ denotes heterozygotes and HO denotes homozygotes. The last 4 columns are embryo sac phenotypes in undeveloped ovules of different lines.

---

**Supplemental Table 2. Primers Used for Identification of T-DNA Insertion Sites**

---

| T-DNA           | LP                     | RP                        |
|-----------------|------------------------|---------------------------|
| insertion lines |                        |                           |
| FLAG_015D01     | TTTCGGTATTCAGCTCCAATG  | CAAATTGGCGATGACTACACC     |
| FLAG_427G04     | CTGAAGCTTTGGCTGAATACG  | ACCAAAGCATCTAAGCTTTTCG    |
| SALK_046705     | TGCCTGTCCAACCTTACTTCTC | TTTCGGTATTCAGCTCCAATG     |
| SALK_082179     | AATATGTTTCAGGCACCAACG  | CCTCTCCGTTTCTTTGCTAGC     |
| SALK_135268c    | CCGTGAAATTATGTGGAGAGC  | CGTGGACCCTCATACTATTC      |
| SALK_148421     | TGGGAAACTTGTTTTAGCTTGG | CGAGACAACACTGCCTTCTTC     |
| SALK_097094     | TCGCTTTCTCATAAGTCCGAC  | AGAACAAGTGCTCTGCTCTCTG    |
| CS859015        | CTTCTTGAAGCTTGCCCCTAG  | AAAAGAAACGTTCAATCTGAGTCTC |

---

The T-DNA specific primer for SALK insertion lines is LBb1: GCGTGGACCGCTTGCTGCAACT; for FLAG insertion lines is FLAG-LB CGTGTGCCAGGTGCCACGGAATAGT; for CS859015 is p745: AACGTCCGCAATGTGTTATTAAGTTGTC. All primers listed in this table are oriented from 5' to 3'.

---
